# Supplementary material for: Deep eutectic solvent-based extraction coupled with green two-dimensional HPLC-DAD-ESI-MS/MS for the determination of anthocyanins from Lycium ruthenicum Murr. fruit
Source: Royal Society of Chemistry journal article supplement (doi:10.1039/c8ay00101d), 2018-01-01
Supplement: c8ay00101d1.pdf [file c8ay00101d1.pdf]

Supplementary material

Deep eutectic solvent-based extraction coupled with green two-dimensional HPLC-DAD-ESI-MS/MS for the determination of anthocyanins from *Lycium ruthenicum* Murr. fruit

Jun Sang, Bing Li, Ya-ya Huang, Qun Ma, Kang Liu, Cui-qin Li\*

*Key Laboratory of the Ministry of Education for Medicinal Resources and Natural Pharmaceutical Chemistry, National Engineering Laboratory for Resource Development of Endangered Crude Drugs in Northwest of China, College of Life Sciences, Shaanxi Normal University, Xi'an, Shaanxi 710062, China*

---

\* Corresponding author. Tel.: +86 29 85310266; fax: +86 29 85310546.  
E-mail address: [licuiqin16@snnu.edu.cn](mailto:licuiqin16@snnu.edu.cn) (C.-Q. Li), [junsang@foxmail.com](mailto:junsang@foxmail.com) (J. Sang)

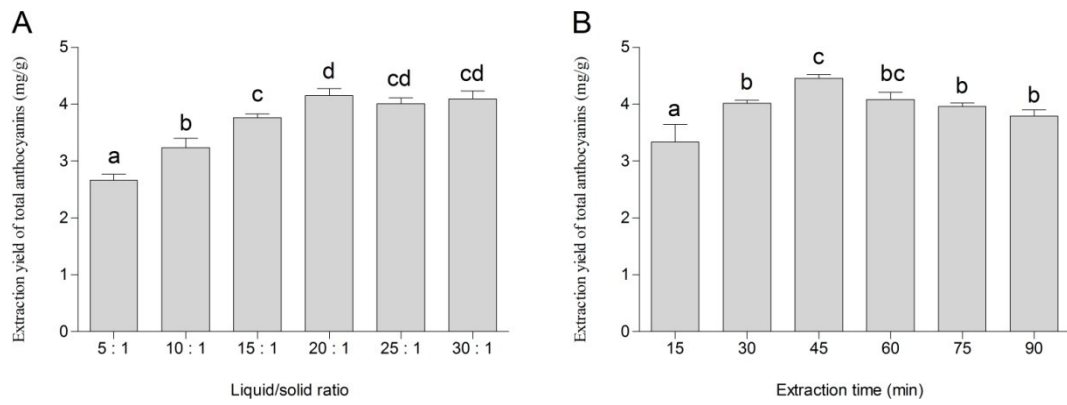

Fig. S1 Effects of liquid/solid ratio (A) and extraction time (B) on extraction yield of total anthocyanins from *L. ruthenicum* fruit. Means with different letters were significantly different at the level of  $p < 0.05$ .

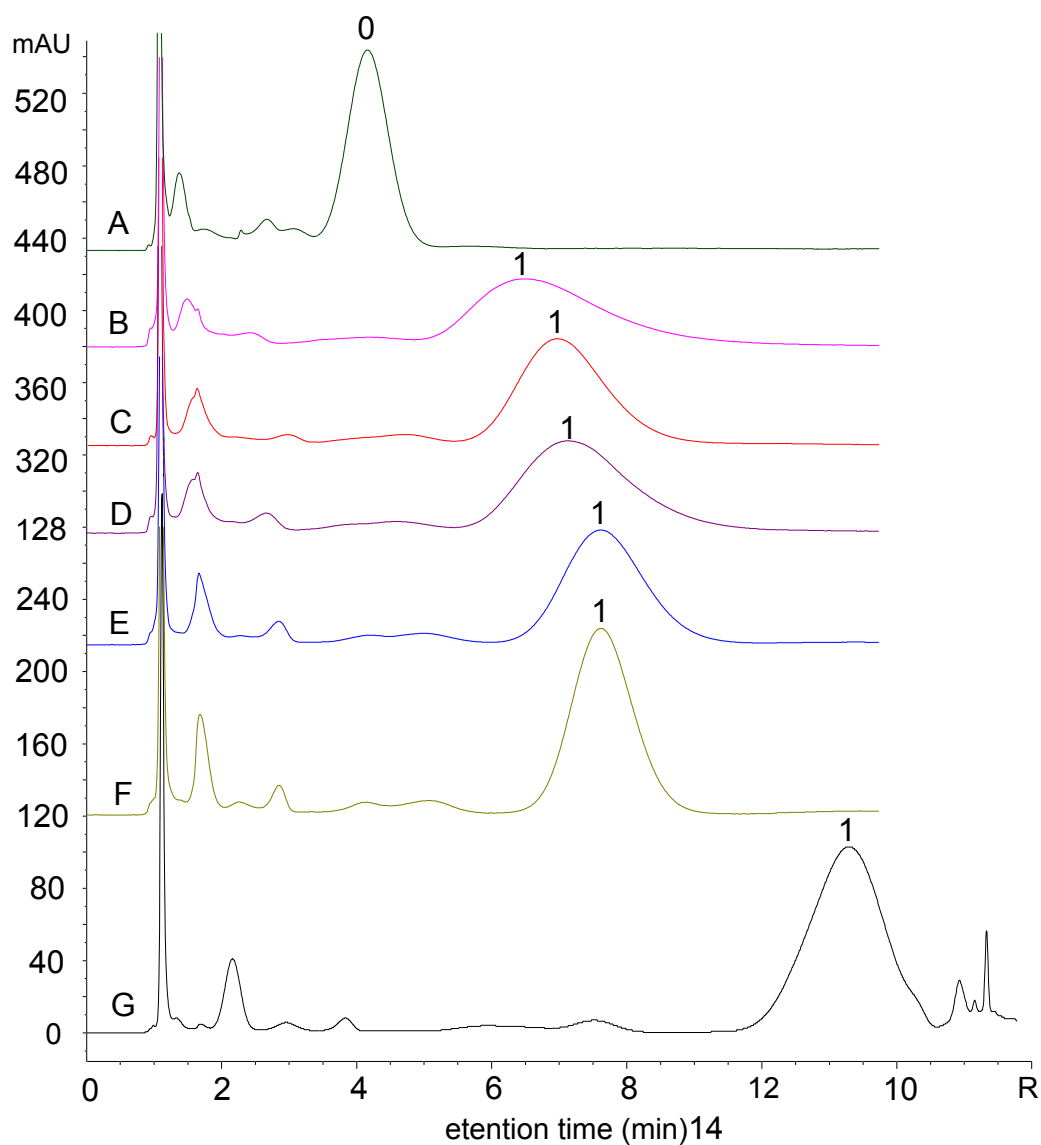

Fig. S2 HPLC-DAD chromatograms of anthocyanins from *L. ruthenicum* fruit using ethanol and fruit acid aqueous solutions (0.1 mol/L) at a ratio of 15:85 (v/v) as mobile phases, including mandelic (A), ascorbic (B), lactic (C), glycolic (D), malic (E), citric (F), and tartaric (G) acids; peak 1, petunidin-3-*O*-(*trans-p*-coumaroyl)-rutinoside-5-*O*-glucoside.

Supplementary Table 1

Physial characteristics of studied macroporous resins.

| Resins   | Polarity   | Surface area (m <sup>2</sup> /g) | Pore size (Å)  |
|----------|------------|----------------------------------|----------------|
| NKA-9    | Polar      | 250-290                          | 155-165        |
| AB-8     | Weak-polar | 480-520                          | 130-140        |
| XDA-6    | Weak-polar | ≥ 650                            | 125            |
| XDA-7    | Weak-polar | ≥ 800                            | 45             |
| HPD-80   | Non-polar  | 350-400                          | 80-85          |
| D101     | Non-polar  | 400-600                          | 100-110        |
| HPD-100A | Non-polar  | 600-700                          | 90-100         |
| X-5      | Non-polar  | 500-600                          | 290-300        |
| LS-305   | Non-polar  | ≥ 800                            | 230            |
| LX-68    | Non-polar  | ≥ 980                            | 45-50          |
| LX-32    | Non-polar  | ≥ 1000                           | - <sup>a</sup> |
| LX-31B   | Non-polar  | ≥ 1200                           | - <sup>a</sup> |

<sup>a</sup> Data are unpublished by resin manufacturer.
